# Supplementary material
Source: PubMed Central journal article supplement (PMC2084285)
Supplement: pnas_0705038104_2.pdf [file pnas_0705038104_2.pdf]

## P RNA: 39 species

| base #1 | base #2 | Base Pairs         | Mismatches |
|---------|---------|--------------------|------------|
| 9       | 73      | 30CG ; 8 UG ; 1 UA | 0          |
| 10      | 72      | 25CG ; 14 UG       | 0          |
| 12      | 70      | 37GC               | 2          |
| 13      | 69      | 29AU ; 10GU        | 0          |
| 14      | 68      | 35CG ; 4UG         | 0          |
| 17      | 64      | 36UG ; 3CG         | 0          |
| 18      | 63      | 38CG ; 1UG         | 0          |

## SRP RNA: 43 species

| base #1 | base #2 | Base Pairs        | Mismatches |
|---------|---------|-------------------|------------|
| 2       | 18      | 23GC ; 13GU ; 1AU | 6          |
| 4       | 16      | 20GC ; 12GU ; 2AU | 9          |
| 5       | 15      | 27GU ; 9AU ; 1UG  | 6          |
| 6       | 14      | 35CG ; 3UG ; 3UA  | 2          |
| 7       | 13      | 25CG ; 10UG 0 2AU | 6          |

## tmRNA: 52 species

| base #1 | base #2 | Base Pairs            | Mismatches |
|---------|---------|-----------------------|------------|
| 11      | 23      | 37CG ; 7UG ; 2AU; 3UA | 3          |
| 13      | 21      | 52 GC                 | 0          |
| 10      | 24      | 39UG; 2CG ; 1AU ; 4UA | 6          |
| 12      | 22      | 36UG ; 1AU ; 8UA      | 7          |
