# Supplementary material
Source: PubMed Central journal article supplement (PMC2084285)

**A**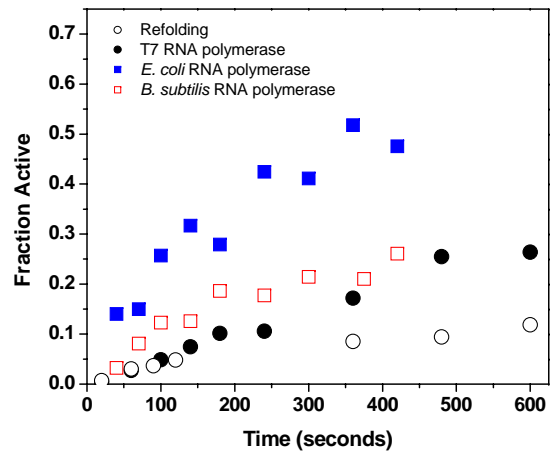**B**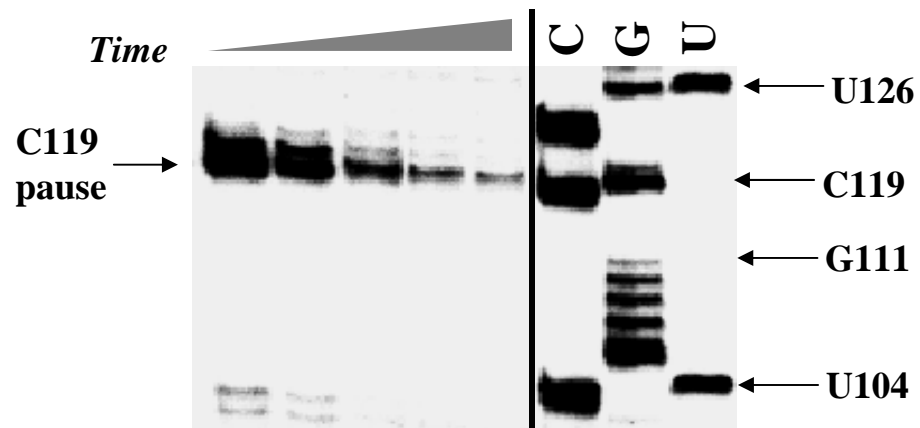**C**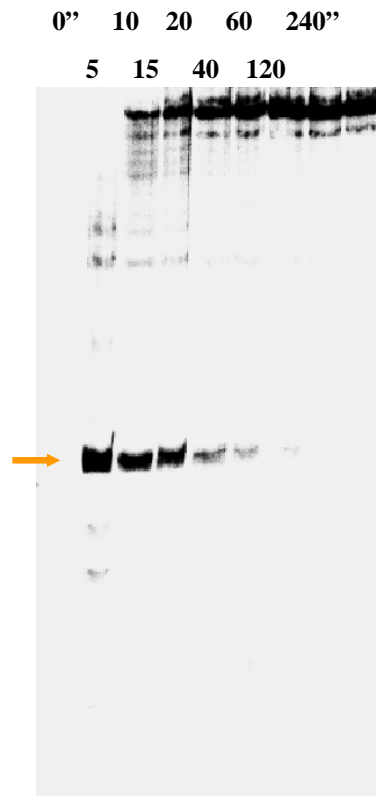**D**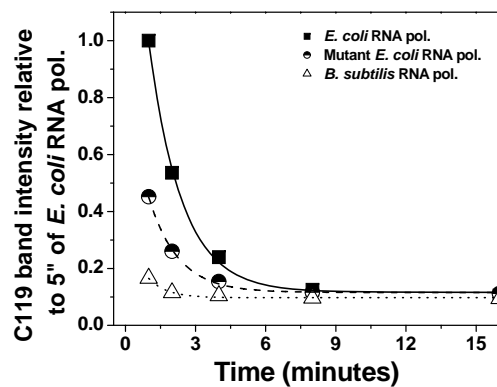

Supplement: pnas_0705038104_1.pdf [file pnas_0705038104_1.pdf]

time (s) **15 30 100 300**

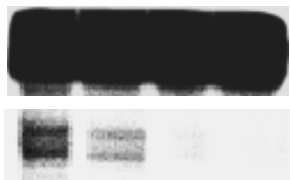

15 30 100 300

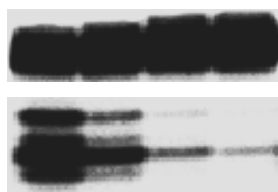

← Full-length

} Product

time (s) 15 30 100 300

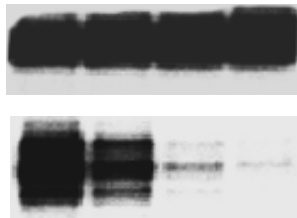

15 30 100 300

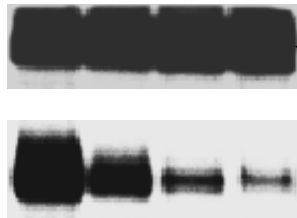

← Full-length

} Product

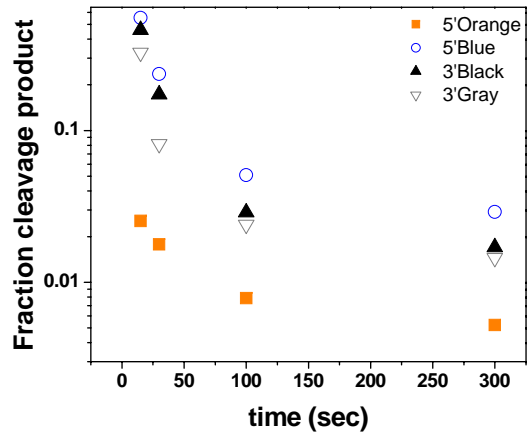

Supplement: pnas_0705038104_3.pdf [file pnas_0705038104_3.pdf]

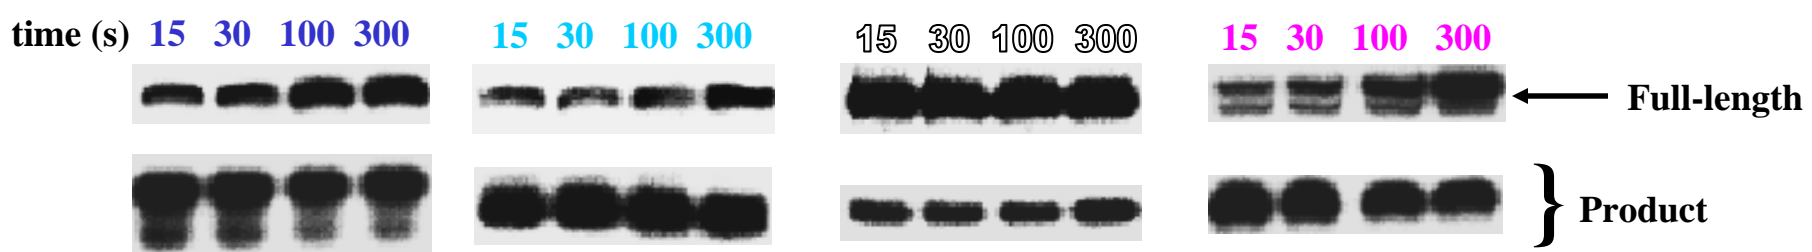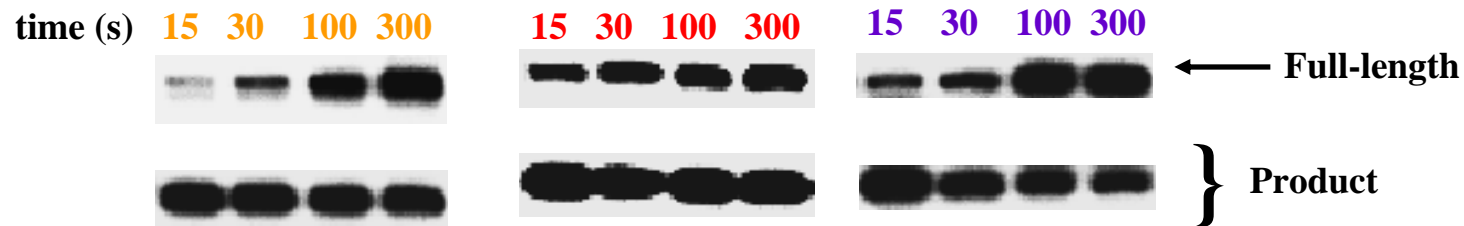

**Upstream: Top 4**

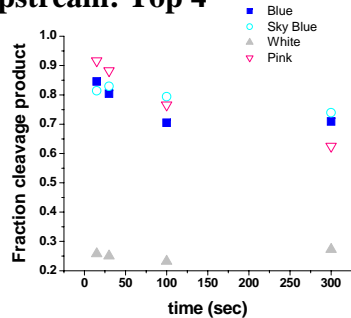

**Downstream: Bottom 3**

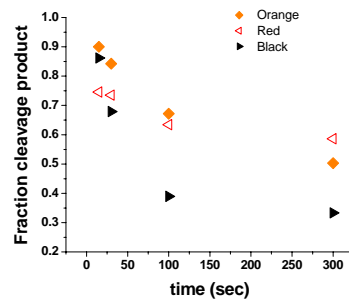

Supplement: pnas_0705038104_4.pdf [file pnas_0705038104_4.pdf]
